# Supplementary material for: Automated high-content image-based characterization of microorganism behavioral diversity and distribution
Source: Research Square preprint supplement (doi:10.21203/rs.3.rs-3167274/v1), 2023-07-19
Supplement: Supplementary file 2 [file 73de60a639fcfa75e161c543.pdf]

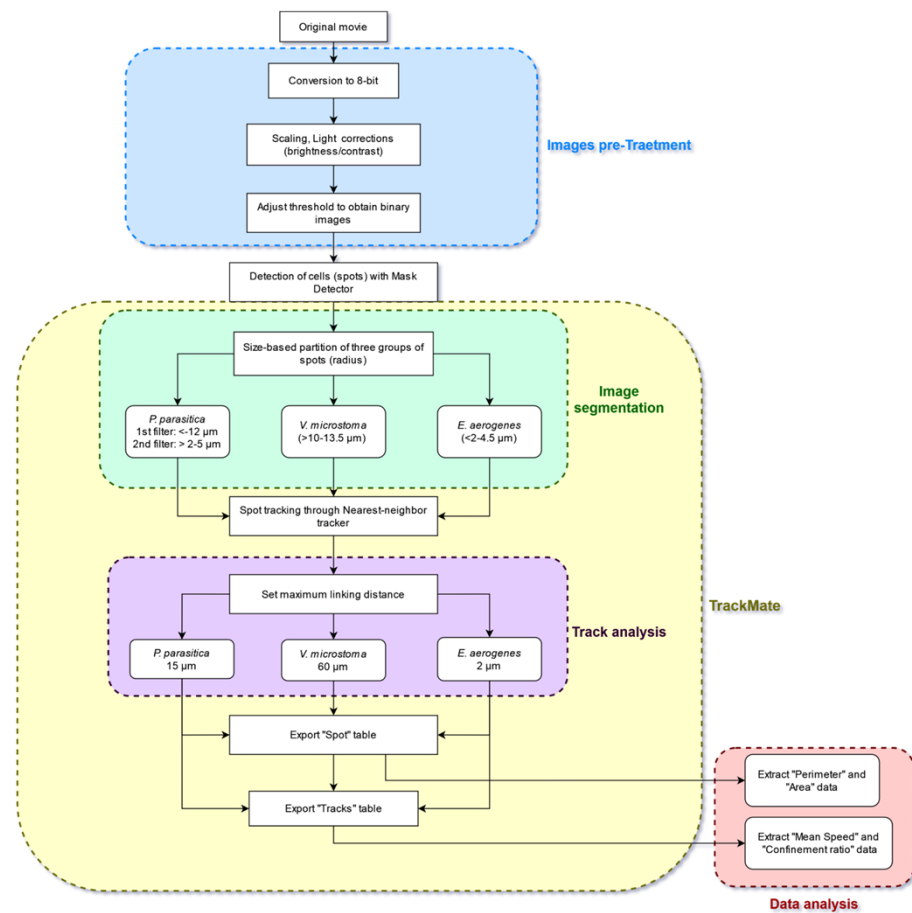

Additional File 1

Method workflow. Workflow representing the different step of the image-based method for microbial mixed-suspension behavioral analysis.
